# Supplementary material for: Self-floating ability and initiating gradient photopolymerization of acrylamide aqueous solution of a water-soluble polysiloxane benzophenone photoinitiator
Source: Royal Society of Chemistry journal article supplement (doi:10.1039/c3gc40704g), 2013-01-01
Supplement: c3gc40704g.pdf [file c3gc40704g.pdf]

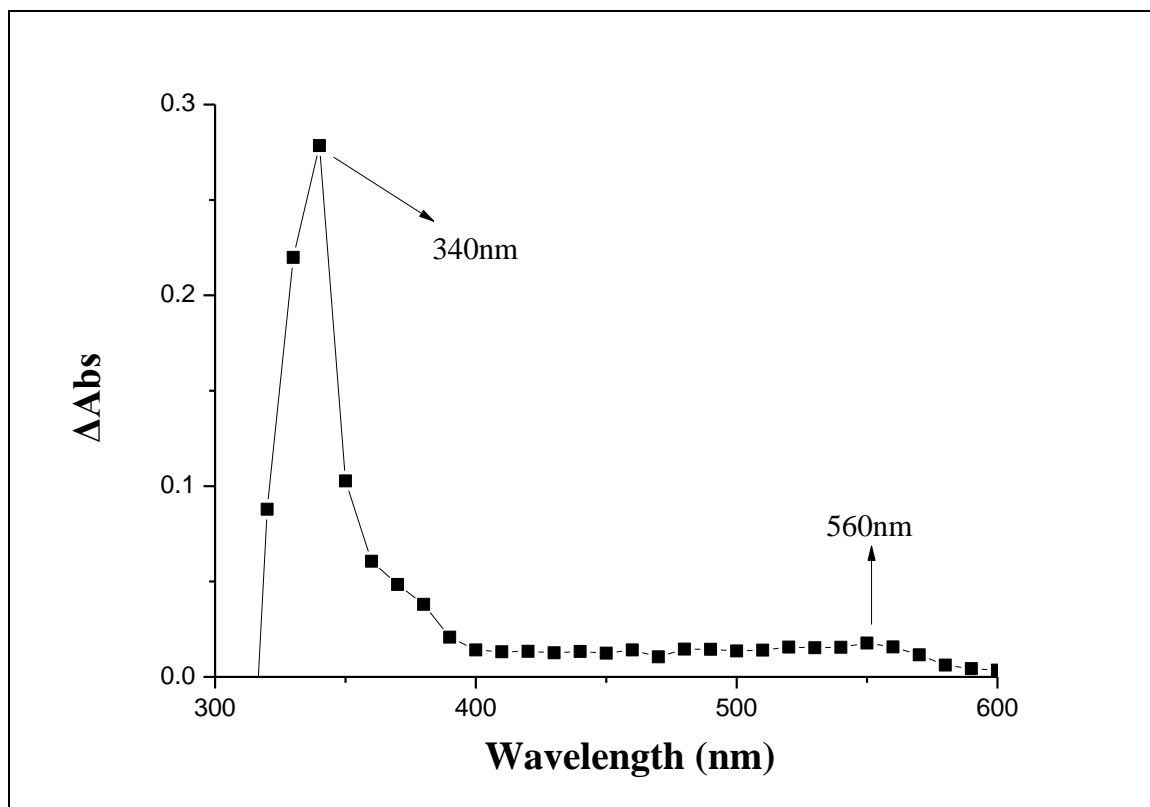

**Fig. S1** Transient optical absorption spectrum recorded 10 ns following laser excitation (355 nm, 4-6 ns) of W-Si-HBP<sub>2</sub>-A ( $1.0 \times 10^{-3}$  M) in argon saturated acetonitrile solution at 25 °C.

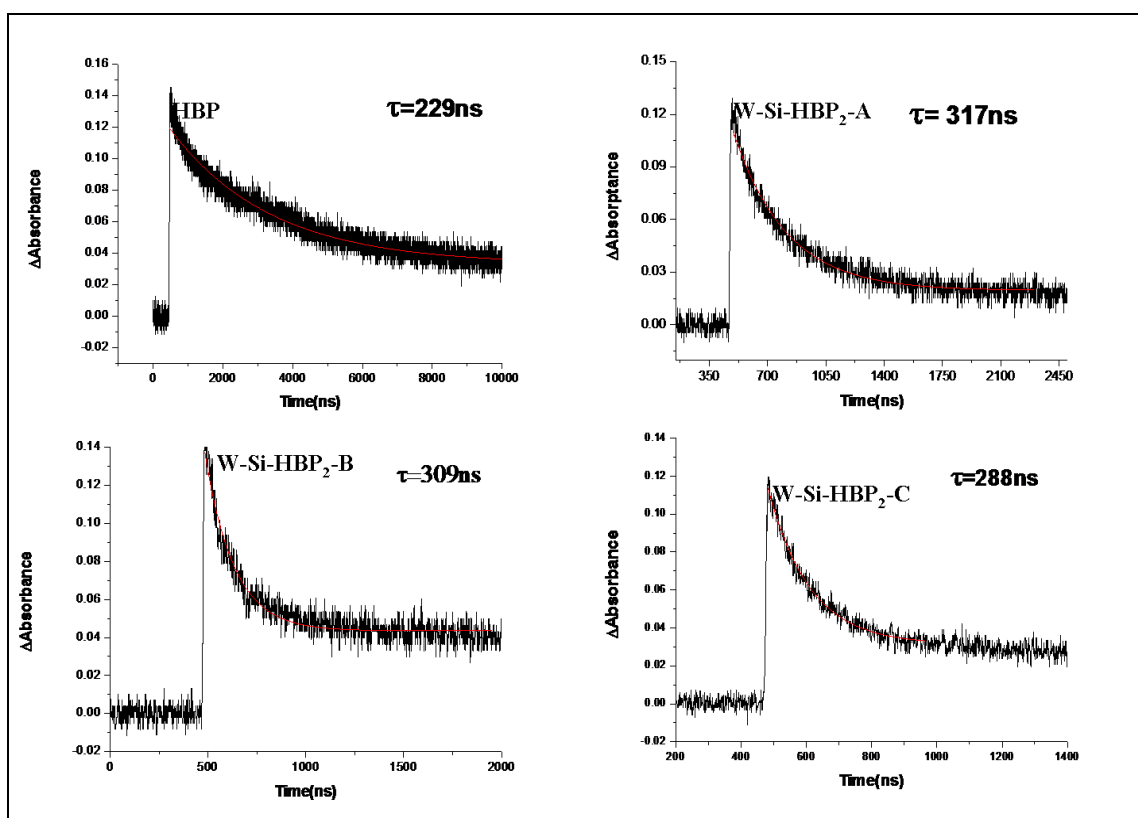

**Fig. S2** Transient absorption kinetics observed at 560 nm following laser excitation (355 nm, 4-6 ns) of HBP and W-Si-HBP<sub>2</sub>-A/B/C ( $1.0 \times 10^{-3}$  M) in argon saturated acetonitrile solution at 25 °C.

**Table S1.** The contact angle and the dispersion surface energy ( $\gamma_s^d$ ) of the gradient polymer film (PAM) initiated by W-Si-HBP<sub>2</sub>-A/B/C

| Initiator<br>(concentration, mol/L)               | $\theta$ (H <sup>2</sup> O)/ <sup>o</sup> |       | $\gamma$ S <sup>d</sup> (H <sup>2</sup> O)/ (mN/m) |     |
|---------------------------------------------------|-------------------------------------------|-------|----------------------------------------------------|-----|
|                                                   | Standing time (min)                       |       |                                                    |     |
|                                                   | 10                                        | 60    | 10                                                 | 60  |
| W-Si-HBP <sub>2</sub> -B (1.0×10 <sup>-3</sup> )  | 24.83                                     | 29.25 | 201                                                | 193 |
| W-Si-HBP <sub>2</sub> - B (2.5×10 <sup>-3</sup> ) | 34.55                                     | 38.88 | 183                                                | 174 |
| W-Si-HBP <sub>2</sub> - B (4.5×10 <sup>-3</sup> ) | 36.79                                     | 41.78 | 179                                                | 168 |
| W-Si-HBP <sub>2</sub> - B (6.0×10 <sup>-3</sup> ) | 41.50                                     | 43.5  | 169                                                | 164 |
| W-Si-HBP <sub>2</sub> -C (1.0×10 <sup>-3</sup> )  | 33.04                                     | 39.71 | 186                                                | 173 |
| W-Si-HBP <sub>2</sub> -C (2.5×10 <sup>-3</sup> )  | 41.50                                     | 45.76 | 169                                                | 159 |
| W-Si-HBP <sub>2</sub> -C (4.5×10 <sup>-3</sup> )  | 43.95                                     | 53.68 | 163                                                | 140 |
| W-Si-HBP <sub>2</sub> -C (6.0×10 <sup>-3</sup> )  | 49.72                                     | 55.91 | 149                                                | 134 |

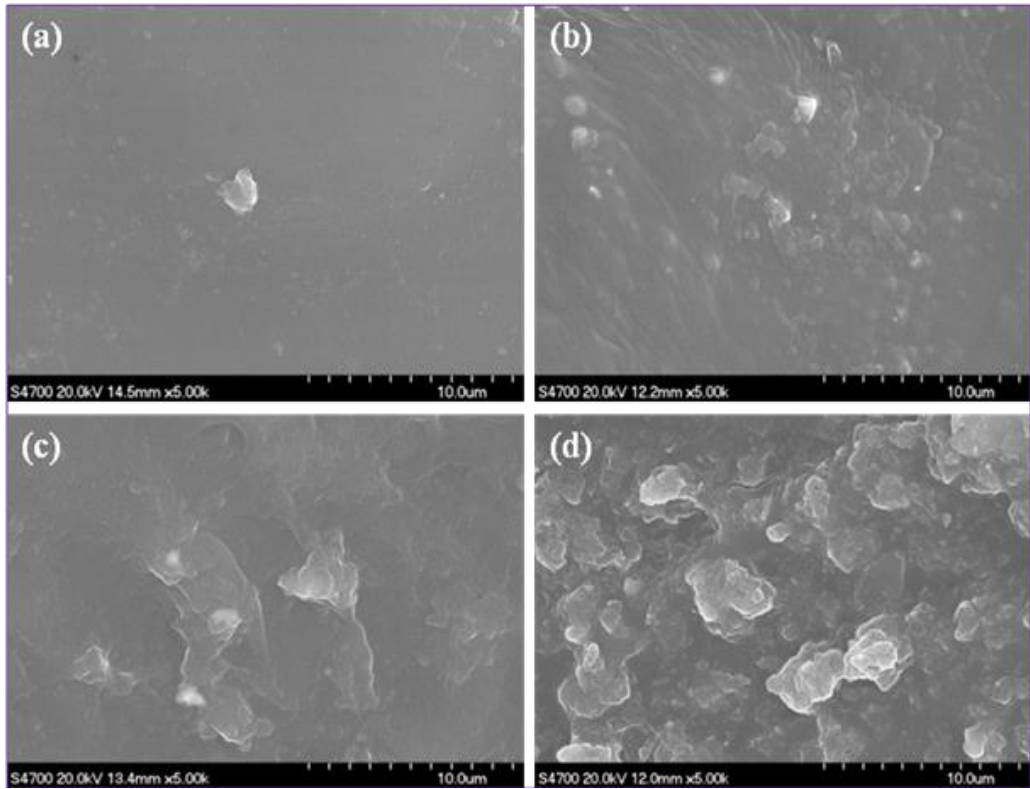

**Fig. S3** SEM images of the polymer films (PAM) initiated by different concentration of W-Si-HBP<sub>2</sub>-B ((a) 1.0×10<sup>-3</sup> mol/L (b) 2.5×10<sup>-3</sup> mol/L (c) 4.5×10<sup>-3</sup> mol/L (d) 6.0×10<sup>-3</sup> mol/L) and TEOA (3.3×10<sup>-2</sup> mol/L)

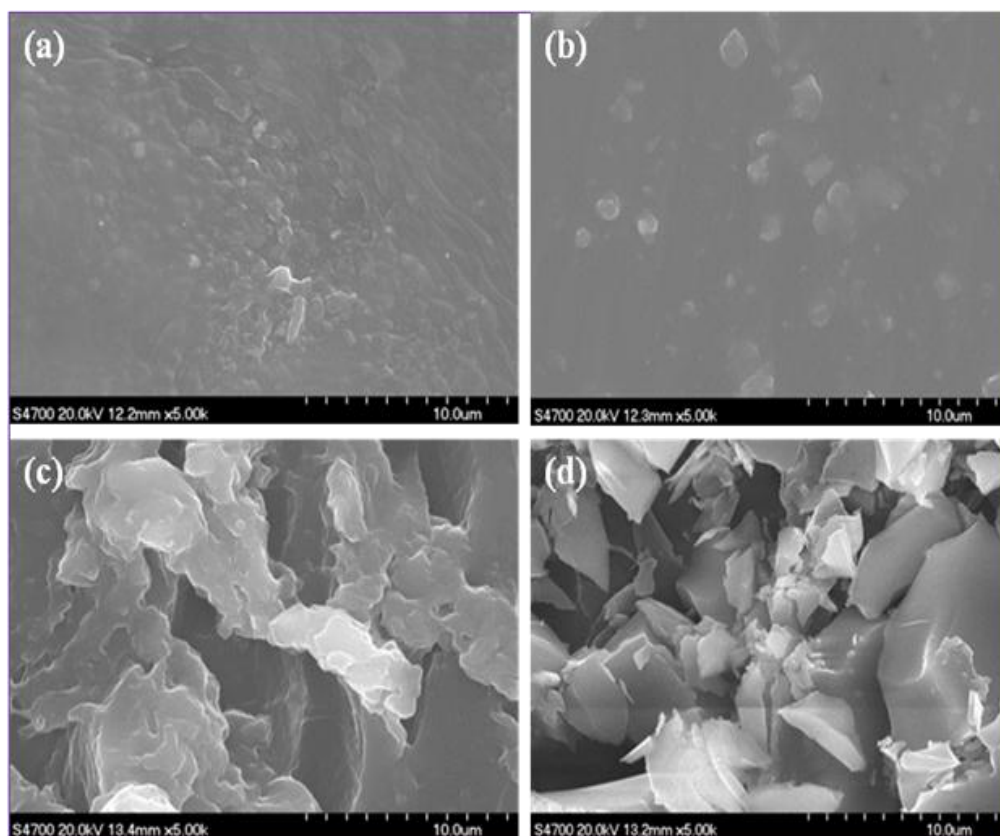

**Fig. S4** SEM images of the polymer films (PAM) initiated by different concentration of W-Si-HBP<sub>2</sub>-C ((a)  $1.0 \times 10^{-3}$  mol/L (b)  $2.5 \times 10^{-3}$  mol/L (c)  $4.5 \times 10^{-3}$  mol/L (d)  $6.0 \times 10^{-3}$  mol/L) and TEOA ( $3.3 \times 10^{-2}$  mol/L)

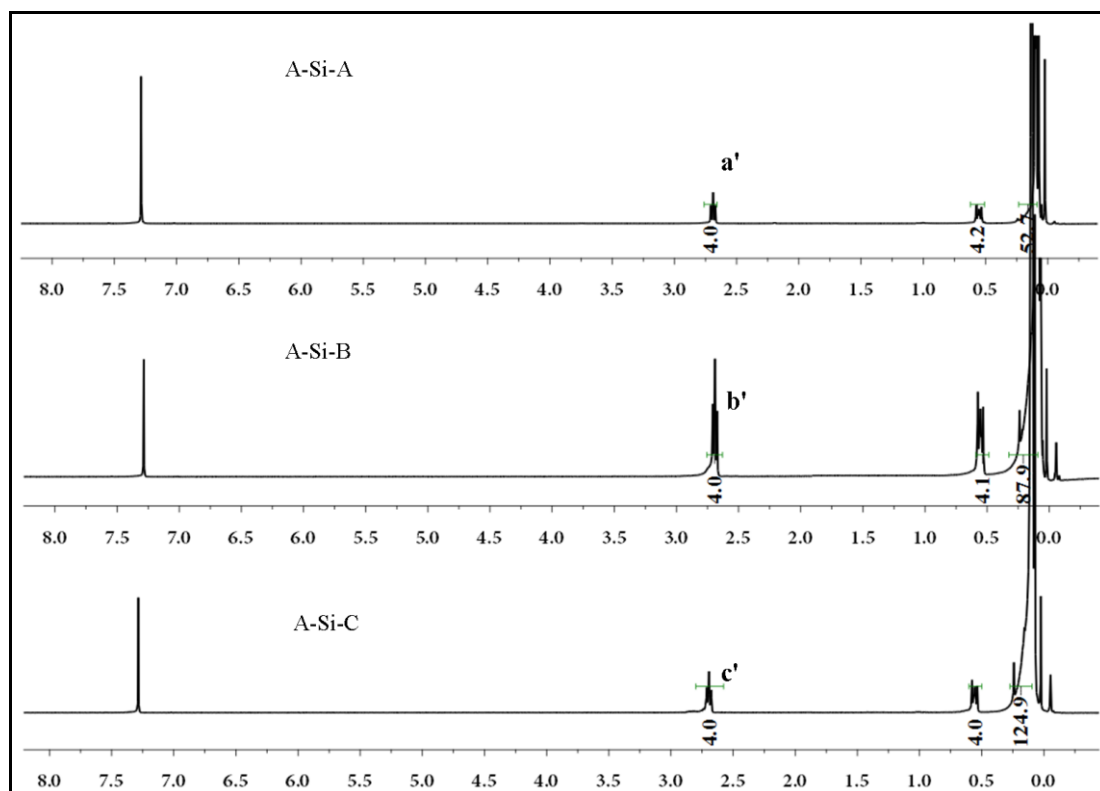

**Fig. S5**  $^1\text{H}$  NMR spectra of the amino polysiloxane A-Si-A/B/C

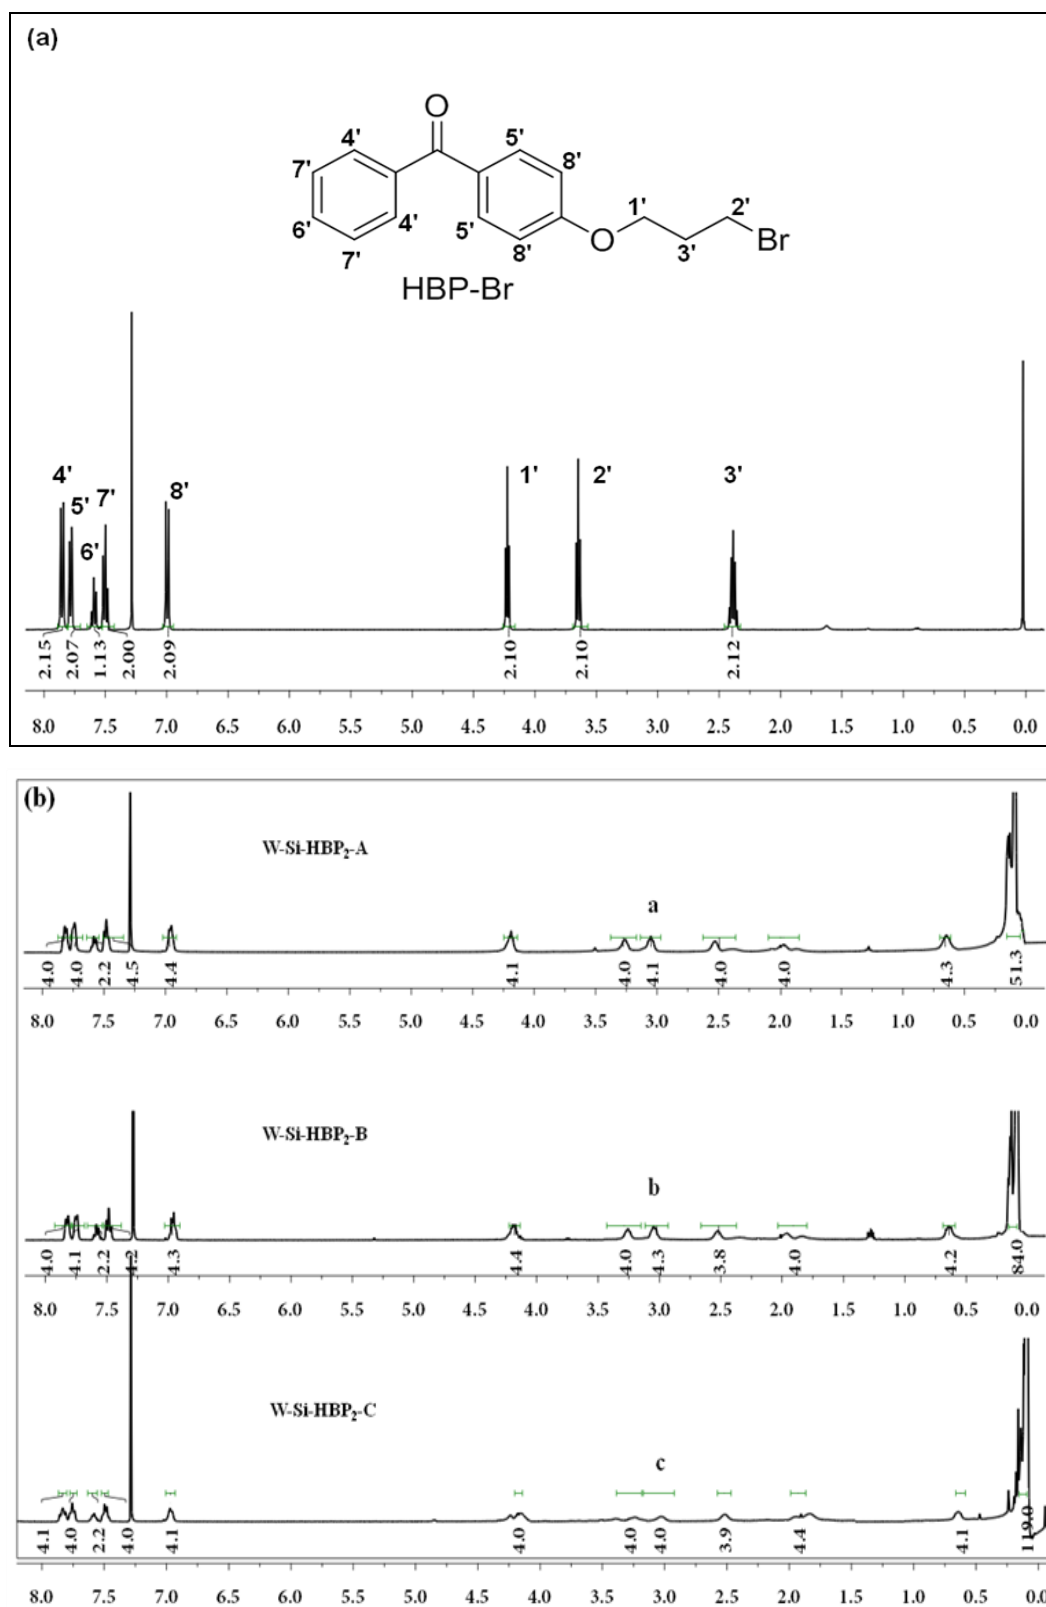

**Fig. S6**  $^1\text{H}$  NMR spectra of the photoinitiators, (a) HBP-Br, (b) W-Si-HBP<sub>2</sub>-A/B/C.

Comparing with the spectrum of amino polysiloxane A-Si-A/B/C that shown in Fig. S5, the signals (6.90-7.91 ppm) of aromatic hydrogen of W-Si-HBP<sub>2</sub>-A/B/C indicated that HBP has been linked with A-Si-A/B/C. After a nucleophilic reaction, the chemical shift of protons in  $-\text{CH}_2\text{-Br}$  group (3.66 ppm) was shifted upfield (3.28 ppm, in Fig. 6(b)) in W-Si-HBP<sub>2</sub>-A/B/C, and the chemical shift of  $-\text{CH}_2\text{-N}$  (peak a'/b'/c')

in Fig. S5) in A-Si-A/B/C (2.65 ppm) was shifted downfield (3.10 ppm) in W-Si-HBP<sub>2</sub>-A/B/C. The integration ratio of Si-CH<sub>3</sub> to -CH<sub>2</sub>-N (peak a/b/c in Fig. 6(b)) in W-Si-HBP<sub>2</sub>-A/B/C was 12.59/19.23/29.88, respectively, which was similar with the corresponding ratio (13.17/21.97/31.22) of Si-CH<sub>3</sub> to -CH<sub>2</sub>-N (peak a'/b'/c' in Fig. S5) in A-Si-A/B/C, demonstrating that HBP linked to both sides of the A-Si-A/B/C. Additionally, the integration ratio verified that polymerization degree (n) of W-Si-HBP<sub>2</sub>-A/B/C was about 7-8, 12-13, 19-20, respectively. Hence, the NMR estimates could deduce the molecular weights of A-Si-A/B/C were 664-738, 1034-1108 and 1552-1626, respectively, and W-Si-HBP<sub>2</sub>-A/B/C were 1302-1376, 1672-1746 and 2190-2264, respectively, similar to the GPC results.
